# Supplementary material for: Trivalent acid radical-centered YLi4+(Y = PO4, AsO4, VO4) cations: new polynuclear species designed to enrich the superalkali family
Source: Royal Society of Chemistry journal article supplement (doi:10.1039/c4dt02347a), 2014-01-01

**Electronic Supplementary Information (ESI)**

**Trivalent acid radical-centered  $YLi_4^+$  ( $Y = PO_4, AsO_4, VO_4$ ) cations: new  
polynuclear species designed to enrich the superalkali family**

Jia-Yuan Liu, Di Wu, Wei-Ming Sun, Ying Li,\* Zhi-Ru Li

*Institute of Theoretical Chemistry, State Key Laboratory of Theoretical and  
Computational Chemistry, Jilin University, Changchun 130023, People's Republic of  
China*

---

\* Email:liyingedu@jlu.edu.cn

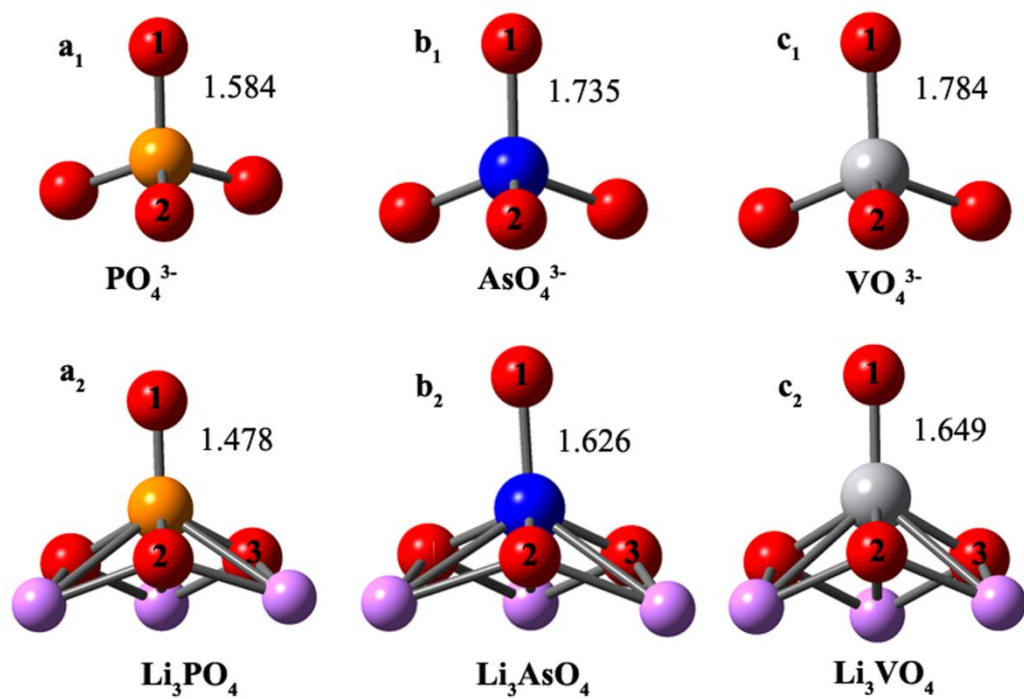

**Figure S1.** Optimized structures of isolated ( $a_1$ )  $PO_4^{3-}$  ( $b_1$ )  $AsO_4^{3-}$  ( $c_1$ )  $VO_4^{3-}$ ; ( $a_2$ )  $Li_3PO_4$  ( $b_2$ )  $Li_3AsO_4$  ( $c_2$ )  $Li_3VO_4$ . Color legend: P, orange-yellow; O, red; Li, purple; As, blue; V, grey.

**Table S1.** The bond length (Å) and the bond angle (°) of (a<sub>1</sub>) PO<sub>4</sub><sup>3-</sup> (b<sub>1</sub>) AsO<sub>4</sub><sup>3-</sup> (c<sub>1</sub>) VO<sub>4</sub><sup>3-</sup>; (a<sub>2</sub>) Li<sub>3</sub>PO<sub>4</sub> (b<sub>2</sub>) Li<sub>3</sub>AsO<sub>4</sub> (c<sub>2</sub>) Li<sub>3</sub>VO<sub>4</sub>. N<sub>x</sub> = P, As, V for **a**, **b** and **c**, respectively.

| structure                            | N <sub>x</sub> -O1 | N <sub>x</sub> -O2 | ∠O1N <sub>x</sub> O2 | ∠O2N <sub>x</sub> O3 | N <sub>x</sub> -Li | O2-Li |
|--------------------------------------|--------------------|--------------------|----------------------|----------------------|--------------------|-------|
| <b>PO<sub>4</sub><sup>3-</sup></b>   | 1.584              |                    | 109.5                |                      |                    |       |
| <b>AsO<sub>4</sub><sup>3-</sup></b>  | 1.735              |                    | 109.5                |                      |                    |       |
| <b>VO<sub>4</sub><sup>3-</sup></b>   | 1.784              |                    | 109.5                |                      |                    |       |
| <b>Li<sub>3</sub>PO<sub>4</sub></b>  | 1.478              | 1.594              | 115.9                | 102.3                | 2.348              | 1.858 |
| <b>Li<sub>3</sub>AsO<sub>4</sub></b> | 1.626              | 1.749              | 118.9                | 98.6                 | 2.447              | 1.884 |
| <b>Li<sub>3</sub>VO<sub>4</sub></b>  | 1.649              | 1.788              | 116.9                | 101.1                | 2.403              | 1.885 |

**Table S2.** The NBO charges of the  $\text{PO}_4\text{Li}_4^+$  cations.

| isomer    | P     | O      |        |        |        | Li    |       |       |       |
|-----------|-------|--------|--------|--------|--------|-------|-------|-------|-------|
|           |       | 1      | 2      | 3      | 4      | 1     | 2     | 3     | 4     |
| <b>P1</b> | 2.443 | -1.266 | -1.266 | -1.266 | -1.266 | 0.906 | 0.906 | 0.906 | 0.906 |
| <b>P2</b> | 2.467 | -1.282 | -1.279 | -1.279 | -1.279 | 0.948 | 0.901 | 0.901 | 0.901 |
| <b>P3</b> | 2.417 | -1.179 | -1.269 | -1.269 | -1.331 | 0.907 | 0.906 | 0.912 | 0.906 |
| <b>P4</b> | 2.618 | -1.331 | -1.331 | -1.331 | -1.331 | 0.927 | 0.927 | 0.927 | 0.927 |
| <b>P5</b> | 2.455 | -1.116 | -1.116 | -1.116 | -1.636 | 0.867 | 0.867 | 0.867 | 0.927 |
| <b>P6</b> | 2.495 | -1.214 | -1.073 | -1.073 | -1.661 | 0.966 | 0.831 | 0.831 | 0.899 |
| <b>P7</b> | 2.440 | -1.089 | -1.160 | -1.039 | -1.664 | 0.938 | 0.831 | 0.839 | 0.904 |

**Table S3.** The NBO charges of the  $\text{AsO}_4\text{Li}_4^+$  cations.

| isomer     | As    | O      |        |        |        | Li    |       |       |       |
|------------|-------|--------|--------|--------|--------|-------|-------|-------|-------|
|            |       | 1      | 2      | 3      | 4      | 1     | 2     | 3     | 4     |
| <b>A1</b>  | 2.476 | -1.279 | -1.279 | -1.279 | -1.279 | 0.909 | 0.909 | 0.909 | 0.909 |
| <b>A2</b>  | 2.531 | -1.301 | -1.296 | -1.296 | -1.296 | 0.952 | 0.902 | 0.902 | 0.902 |
| <b>A3</b>  | 2.461 | -1.172 | -1.281 | -1.281 | -1.359 | 0.909 | 0.906 | 0.912 | 0.906 |
| <b>A4</b>  | 2.487 | -1.205 | -1.205 | -1.365 | -1.375 | 0.903 | 0.903 | 0.958 | 0.898 |
| <b>A5</b>  | 2.725 | -1.362 | -1.362 | -1.362 | -1.362 | 0.931 | 0.931 | 0.931 | 0.931 |
| <b>A6</b>  | 1.614 | -1.180 | -1.180 | -0.818 | -0.789 | 0.819 | 0.819 | 0.812 | 0.903 |
| <b>A7</b>  | 1.625 | -1.306 | -1.301 | -0.725 | -0.789 | 0.858 | 0.839 | 0.883 | 0.916 |
| <b>A8</b>  | 1.582 | -1.273 | -1.096 | -0.819 | -0.819 | 0.803 | 0.860 | 0.860 | 0.901 |
| <b>A9</b>  | 1.580 | -1.393 | -1.244 | -0.652 | -0.747 | 0.839 | 0.854 | 0.816 | 0.948 |
| <b>A10</b> | 2.514 | -1.239 | -1.069 | -1.069 | -1.660 | 0.965 | 0.838 | 0.838 | 0.899 |
| <b>A11</b> | 2.442 | -1.079 | -1.176 | -1.028 | -1.662 | 0.935 | 0.829 | 0.837 | 0.904 |
| <b>A12</b> | 1.558 | -1.077 | -1.274 | -0.816 | -0.835 | 0.774 | 0.872 | 0.899 | 0.899 |
| <b>A13</b> | 1.560 | -1.087 | -1.274 | -0.810 | -0.806 | 0.904 | 0.809 | 0.809 | 0.894 |

**Table S4.** The NBO charges of the  $\text{VO}_4\text{Li}_4^+$  cations.

| isomer    | V     | O      |        |        |        | Li    |       |       |       |
|-----------|-------|--------|--------|--------|--------|-------|-------|-------|-------|
|           |       | 1      | 2      | 3      | 4      | 1     | 2     | 3     | 4     |
| <b>V1</b> | 0.677 | -0.820 | -0.820 | -0.820 | -0.820 | 0.901 | 0.901 | 0.901 | 0.901 |
| <b>V2</b> | 0.774 | -0.839 | -0.846 | -0.846 | -0.846 | 0.942 | 0.887 | 0.887 | 0.887 |
| <b>V3</b> | 0.678 | -0.552 | -0.840 | -1.036 | -0.840 | 0.902 | 0.901 | 0.893 | 0.893 |
| <b>V4</b> | 0.740 | -0.570 | -0.570 | -1.080 | -1.120 | 0.889 | 0.944 | 0.889 | 0.877 |
| <b>V5</b> | 0.772 | -0.605 | -1.101 | -0.605 | -1.101 | 0.879 | 0.875 | 0.943 | 0.943 |
| <b>V6</b> | 0.810 | -0.651 | -0.651 | -0.651 | -1.393 | 0.869 | 0.869 | 0.869 | 0.929 |
| <b>V7</b> | 1.071 | -0.592 | -0.592 | -0.592 | -1.631 | 0.805 | 0.805 | 0.805 | 0.919 |
| <b>V8</b> | 1.210 | -0.878 | -0.574 | -0.574 | -1.654 | 0.946 | 0.812 | 0.812 | 0.899 |

**Figure S2.** HOMOs of the  $\text{PO}_4\text{Li}_4^+$  cations.

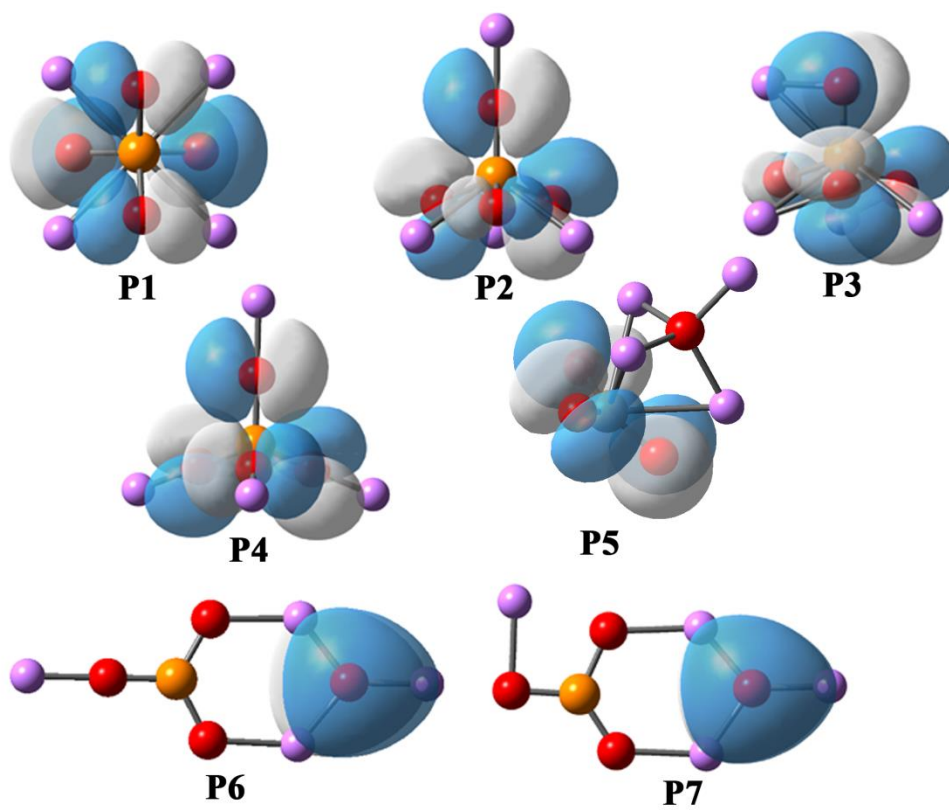

Supplement: c4dt02347a1.pdf [file c4dt02347a1.pdf]
